# Supplementary material for: Comparison of estimated and measured GFR in pediatric CKD patients transitioning from adolescence to adulthood: results from KNOW-PedCKD
Source: Research Square preprint supplement (doi:10.21203/rs.3.rs-7254178/v1), 2025-09-08
Supplement: Supplementary file 1 [file 7f90fb0cc9495f08bd0340fa.docx]

Supplementation. List of eGFR equations

In this study, U25Cr equation, U25cysC equation, U25Cr-cysC equation, SchwartzCr equation, CKiDCr-CysC equation, FASCr-Age equation, FASCr-Ht equation, FAScysC equation, CKD-EPICr equation and CKD-EPICr-CysC equation were analyzed by comparing it with isotope GFR.

The U25 equation used in this study are as follows.

- U25Cr age- and sex-dependent equation using Scr:

eGFR = κ × (height/Scr), with height in m and serum creatinine in mg/dL

For males, κ is calculated as:

For 1 to <12 years old: 39.0 × 1.008(age-12)

For 12 to <18 years old: 39.0 × 1.045(age-12)

For 18 to 25 years old: 50.8

For females, κ is calculated as:

For 1 to <12 years old: 36.1 × 1.008(age-12)

For 12 to <18 years old: 36.1 × 1.023(age-12)

For 18 to 25 years old: 41.4

- U25CysC age- and sex-dependent equation using cysC:

eGFR = κ × (1/cysC), with serum cystatin C in mg/dL

For males, κ is calculated as:

For 1 to <15 years old: κ = 87.2 × 1.011(age-15)

For 15 to <18 years old: κ =87.2 × 0.960(age-15)

For 18 to 25 years old: κ = 77.1

For females, κ is calculated as:

For 1 to <12 years old: κ =79.9 × 1.004(age-12)

For 12 to <18 years old: κ = 79.9 × 0.974(age-12)

For 18 to 25 years old: κ = 68.3

- U25Cr-CysC equation:

, mean based on serum creatinine level and serum cystatin C

The Schwartz equations used in this study are as follows.

- SchwartzCr equation (2009):

eGFR = 0.413 × (height/Scr), with height in cm and serum creatinine in mg/dL

- CKiDCr-CysC equation (2012):

eGFR = 39.8 × [ht/Scr]0.456× [1.8/cysC]0.418× [30/BUN]0.079× [1.076 male] [1.00 female] × [ht/1.4]0.179

Full Age spectrum (FAS) equation used in this study are as follows.

- FASCr-Age equation:

eGFR = 107.3/(Scr/Q), with serum creatinine in mg/dL

Q calculated as a function of age in years [Q(age)] as:

Males: Q = 0.21 + (0.057 × age) - (0.0075 × age2) + (0.00064 × age3) - (0.000016 × age4)

- FASCr-Ht equation:

eGFR = 107.3/(Scr/Q), with serum creatinine in mg/dL

Q calculated as a function of height in m [Q(height)] as:

All: Q = 3.94 - (13.4 × height) + (17.6 × height2) - (9.84 × height3) + (2.04 × height4)

- FASCysC equation using cysC:

eGFR = 107.3(cysC/Q), with serum cystatin C in mg/L and Q =0.82 for males and females < 70 years old

The CKD-EPI equations used in this study are as follows.

- CKD-EPICr equation:

eGFRcr= 142 × min (Scr/κ, 1)α × max(Scr/κ, 1)-1.200 × 0.9938Age × [1.012 if female]

where Scr is serum creatinine in mg/dL, κ is 0.7 for females and 0.9 for males, α is -0.241 for female and -0.302 for males, min is the minimum of Scr/ κ or 1, and max is the maximum of Scr/κ or 1.

- CKD-EPICr-Cystatin C equation:

eGFRcr-cys= 135 × min (Scr/κ, 1)α× max (Scr/κ, 1)-0.544× min(ScysC/0.8, 1)-0.323× max(ScysC/0.8, 1)-0.778× 0.9961Age× 0.963 [if female]

where Scr is serum creatinine, ScysC is serum cystatin C, κ is 0.7 for females and 0.9 for males, α is -0.219 for females and -0.144 for males, min indicates the minimum of Scr/κ or 1, and max indicates the maximum of Scr/κ or 1.
